# Supplementary material for: Phospholipase D3 degrades mitochondrial DNA to regulate nucleotide signaling and APP metabolism
Source: PubMed Central journal article supplement (PMC10209153; doi:10.1038/s41467-023-38501-w), 2023-05-24
Supplement: 41467_2023_38501_MOESM2_ESM.pdf [file 41467_2023_38501_MOESM2_ESM.pdf]

**Title: Supplementary Movie 1.**

**Description:** Fast airyscan microscopy imaging of mitochondria-lysosome contacts in xWt SH-SY5Y cells, stained with MitoTracker Deep Red and LysoTracker Green. Images (n = 500) were taken at an interval of 0.25s and movies generated at 7 frames/seconds. The scale bar = 1  $\mu$ m. Videos support data of figure 4.

**Title: Supplementary Movie 2.**

**Description:** Fast airyscan microscopy imaging of mitochondria-lysosome contacts in PLD3 KO SH-SY5Y cells, stained with MitoTracker Deep Red and LysoTracker Green. Images (n = 500) were taken at an interval of 0.25s and movies generated at 7 frames/seconds. The scale bar = 1  $\mu$ m. Videos support data of figure 4.

**Title: Supplementary Movie 3.**

**Description:** Fast airyscan microscopy imaging of mitochondria-lysosome contacts in xM6R SH-SY5Y cells, stained with MitoTracker Deep Red and LysoTracker Green. Images (n = 500) were taken at an interval of 0.25s and movies generated at 7 frames/seconds. The scale bar = 1  $\mu$ m. Videos support data of figure 4.

**Title: Supplementary Movie 4.**

**Description:** Fast airyscan microscopy imaging of mitochondria-lysosome contacts in xV232M SH-SY5Y cells, stained with MitoTracker Deep Red and LysoTracker Green. Images (n = 500) were taken at an interval of 0.25s and movies generated at 7 frames/seconds. The scale bar = 1  $\mu$ m. Videos support data of figure 4.

**Title: Supplementary data 1**

**Description:** Html file containing graphical representations of all lipid classes analyzed, with the option for both a quantitative and relative quantitation display.
